# Supplementary material for: Prevalence and factors associated with preoperative anxiety among patients undergoing surgery in low-income and middle-income countries: a systematic review and meta-analysis
Source: PubMed Central journal article supplement — BMJ Open. 2022 Mar 11;12(3):e058187. doi: 10.1136/bmjopen-2021-058187 (PMC8919464; doi:10.1136/bmjopen-2021-058187), 2022-03-11
Supplement: bmjopen-2021-058187supp002.pdf [file bmjopen-2021-058187supp002.pdf]

**Supplementary file 2:** The search strategies and search results in each database**1. PubMed search history**

| Search | Query                                                                                                                                                                                                                                                                                                                                                                                                                                                                                                       | Items found               |
|--------|-------------------------------------------------------------------------------------------------------------------------------------------------------------------------------------------------------------------------------------------------------------------------------------------------------------------------------------------------------------------------------------------------------------------------------------------------------------------------------------------------------------|---------------------------|
| #6     | #3 AND #2 AND #1: Humans; English; Adult 18+ years                                                                                                                                                                                                                                                                                                                                                                                                                                                          | <a href="#">681</a>       |
| #5     | #3 AND #2 AND #1 Filters: Humans                                                                                                                                                                                                                                                                                                                                                                                                                                                                            | <a href="#">2,915</a>     |
| #4     | #3 AND #2 AND #1                                                                                                                                                                                                                                                                                                                                                                                                                                                                                            | <a href="#">2,385</a>     |
| #3     | Surgical patients[Mesh] OR Patients Undergoing Surgery[Mesh] OR Surgery[Mesh] OR Surgical Patients[Title/Abstract] OR Patients Undergoing Surgery[Title/Abstract] OR Surgery[Title/Abstract]                                                                                                                                                                                                                                                                                                                | <a href="#">4,000,195</a> |
| #2     | Preoperative Anxiety[Mesh] OR Anxiety[Mesh] OR Anxiety symptoms[Mesh] OR Anxiety disorder[Mesh] OR General Anxiety disorder[Mesh] OR Mental Health Problems[Mesh] OR Preoperative Anxiety[Title/Abstract] OR Anxiety[Title/Abstract] OR Anxiety symptoms[Title/Abstract] OR Anxiety disorder[Title/Abstract] OR General Anxiety disorder[Title/Abstract] OR Mental Health Problems[Title/Abstract]                                                                                                          | <a href="#">312,808</a>   |
| #1     | Prevalence[Mesh] OR Magnitude[Mesh] OR Epidemiology[Mesh] OR Incidence[Mesh] OR Burden[Mesh] OR Estimates [Mesh] OR Associated factors[Mesh] OR Determinants[Mesh] OR Correlates[Mesh] OR Predictors[Mesh] OR Prevalence[Title/Abstract] OR Magnitude[Title/Abstract] OR Epidemiology[Title/Abstract] OR Incidence[Title/Abstract] OR Burden[Title/Abstract] OR Estimates OR Associated factors[Title/Abstract] OR Determinants[Title/Abstract] OR Correlates[Title/Abstract] OR Predictors[Title/Abstract] | <a href="#">3,726,562</a> |

**2. SCOPUS search history**

| Search | Query                                                                                                                                                             | Items found            |
|--------|-------------------------------------------------------------------------------------------------------------------------------------------------------------------|------------------------|
| #6     | #5 AND (LIMIT-TO ( LANGUAGE, "English"))                                                                                                                          | <a href="#">313</a>    |
| #5     | #4 AND (LIMIT-TO ( SUBJECT, "human"))                                                                                                                             | <a href="#">987</a>    |
| #4     | #3 AND #2 AND #1                                                                                                                                                  | <a href="#">1,892</a>  |
| #3     | "Surgical patients" OR "Patients Undergoing Surgery" OR "Surgery"                                                                                                 | <a href="#">19,114</a> |
| #2     | "Preoperative Anxiety" OR "Anxiety" OR "Anxiety symptoms" OR "Anxiety disorder" OR "General Anxiety disorder" OR "Mental Health Problems"                         | <a href="#">21,138</a> |
| #1     | "Prevalence" OR "Magnitude" OR "Epidemiology" OR "Incidence" OR "Burden" OR "Estimates" OR "Associated factors" OR "Determinants" OR "Correlates" OR "Predictors" | <a href="#">8943</a>   |

### 3. CINAHL search history

| Search | Query                                                                                                                                                                                                               | Items found           |
|--------|---------------------------------------------------------------------------------------------------------------------------------------------------------------------------------------------------------------------|-----------------------|
| S5     | Limiters: Human subject and English language                                                                                                                                                                        | <a href="#">384</a>   |
| S4     | S1 AND S2 AND S3                                                                                                                                                                                                    | <a href="#">843</a>   |
| S3     | (MH "Surgical patients") OR (MH "Patients Undergoing Surgery") OR "Surgery"                                                                                                                                         | <a href="#">3,421</a> |
| S2     | (MH "Preoperative Anxiety") OR (MH "Anxiety") OR (MH "Anxiety symptoms") OR (MH "Anxiety disorder") OR (MH "General Anxiety disorder") OR (MH "Mental Health Problems")                                             | <a href="#">9,124</a> |
| S1     | (MH "Prevalence") OR (MH "Magnitude") OR (MH "Epidemiology") OR (MH "Incidence") OR (MH "Burden") OR (MH "Estimates") OR (MH "Associated factors") OR (MH "Determinants") OR (MH "Correlates") OR (MH "Predictors") | <a href="#">7,841</a> |

### 4. PsychINFO search history

| Search | Query                                                                                                                                                                        | Items found            |
|--------|------------------------------------------------------------------------------------------------------------------------------------------------------------------------------|------------------------|
| #5     | Filters: Human subject and English language                                                                                                                                  | <a href="#">492</a>    |
| #4     | S1 AND S2 AND S3                                                                                                                                                             | <a href="#">1231</a>   |
| #3     | (MH "Surgical patients") OR (MH "Patients Undergoing Surgery") OR "Surgery"                                                                                                  | <a href="#">4,574</a>  |
| #2     | (Preoperative Anxiety) OR (Anxiety.tw,id.) OR (Anxiety symptoms.tw,id.) OR (Anxiety disorder.tw,id.) OR (General Anxiety disorder.tw,id.) OR (Mental Health Problems.tw,id.) | <a href="#">9,457</a>  |
| #1     | (Prevalence) OR (Magnitude) OR (Epidemiology) OR (Incidence) OR (Burden) OR (Estimates) OR (Associated factors) OR (Determinants) OR (Correlates) OR (Predictors)            | <a href="#">12,531</a> |

### 5. Embase search history (Elsevier)

| No | Query                                                                                                                                                                          | Results                |
|----|--------------------------------------------------------------------------------------------------------------------------------------------------------------------------------|------------------------|
| #6 | #5 AND 'human'/de                                                                                                                                                              | <a href="#">240</a>    |
| #5 | #4 AND [english]/lim                                                                                                                                                           | <a href="#">741</a>    |
| #4 | #1 AND #2 AND #3                                                                                                                                                               | <a href="#">1109</a>   |
| #3 | Surgical patients':ti,ab OR Patients Undergoing Surgery':ti,ab OR Surgery':ti,ab OR Surgical Patients':ti,ab OR Patients Undergoing Surgery':ti,ab OR Surgery':ti,ab           | <a href="#">43,865</a> |
| #2 | 'Preoperative Anxiety':ti,ab OR 'Anxiety':ti,ab OR 'Anxiety symptoms':ti,ab OR 'Anxiety disorder':ti,ab OR 'General Anxiety disorder':ti,ab OR 'Mental Health Problems':ti,ab. | <a href="#">21,143</a> |
| #1 | 'Prevalence':ti,ab OR 'Magnitude': ti,ab OR 'Epidemiology':ti,ab OR 'Incidence':ti,ab OR 'Burden':ti,ab OR 'Estimates':ti,ab OR 'Associated                                    | <a href="#">23,421</a> |

|  |                                                                                                             |  |
|--|-------------------------------------------------------------------------------------------------------------|--|
|  | factors':ti,ab OR 'Determinants':ti,ab OR 'Correlates':ti,ab OR<br>'Predictors':ti,ab OR 'Prevalence':ti,ab |  |
|--|-------------------------------------------------------------------------------------------------------------|--|
