# Supplementary material for: Prevalence and factors associated with preoperative anxiety among patients undergoing surgery in low-income and middle-income countries: a systematic review and meta-analysis
Source: PubMed Central journal article supplement — BMJ Open. 2022 Mar 11;12(3):e058187. doi: 10.1136/bmjopen-2021-058187 (PMC8919464; doi:10.1136/bmjopen-2021-058187), 2022-03-11
Supplement: bmjopen-2021-058187supp003.pdf [file bmjopen-2021-058187supp003.pdf]

**Supplementary file 3:** Summary of the agreed level of bias and level of agreement on the methodological qualities of included studies in a meta-analysis based on sampling, outcome, response rate and method of analysis.

| Study                       | Overall agreement and precision |             |                    |
|-----------------------------|---------------------------------|-------------|--------------------|
|                             | Percentage of agreement         | Kappa value | Level of agreement |
| Bedaso A. et al (14)        | 75                              | 0.60        | Moderate           |
| Takele G. et al (15)        | 100                             | 1           | Almost perfect     |
| Woldegerima YB. et al (16)  | 100                             | 1           | Almost perfect     |
| Mulugeta H. et al (17)      | 75                              | 0.60        | Moderate           |
| Adesanmi A. et al (36)      | 100                             | 1           | Almost perfect     |
| Nigussie S. et al (5)       | 100                             | 1           | Almost perfect     |
| Ebirim L., Tobin, M (57)    | 100                             | 1           | Almost perfect     |
| Srahbzu M. et al (18)       | 100                             | 1           | Almost perfect     |
| Ryamukuru, David (49)       | 75                              | 0.50        | Moderate           |
| Mellouli et al (50)         | 75                              | 0.60        | Moderate           |
| Dagona, Sabo Saleh (51)     | 100                             | 1           | Almost perfect     |
| Mthias AT et al (61)        | 100                             | 1           | Almost perfect     |
| Carneiro AF et al (52)      | 100                             | 1           | Almost perfect     |
| Ramesh C et al (60)         | 75                              | 0.60        | Moderate           |
| Gonçalves et al (53)        | 100                             | 1           | Almost perfect     |
| Maria Luiza MA et al (54)   | 100                             | 1           | Almost perfect     |
| Caumo W et al (55)          | 75                              | 0.60        | Moderate           |
| Jafar MF et al (11)         | 75                              | 0.60        | Moderate           |
| Maheshwari D, Ismail S (12) | 100                             | 1           | Almost perfect     |
| Ali A et al (62)            | 100                             | 1           | Almost perfect     |
| Ayman M Y et al (63)        | 75                              | 0.60        | Moderate           |
| Tajgna K et al (59)         | 100                             | 1           | Almost perfect     |
| Le Xu et al (64)            | 100                             | 1           | Almost perfect     |
| Sntos LJF et al (56)        | 100                             | 1           | Almost perfect     |
| Khalili et al (65)          | 100                             | 1           | Almost perfect     |

|                     |     |      |                |
|---------------------|-----|------|----------------|
| Arshi et al (58)    | 100 | 1    | Almost perfect |
| Bansal T et al (58) | 75  | 0.60 | Moderate       |
