# Supplementary material for: Prevalence and factors associated with preoperative anxiety among patients undergoing surgery in low-income and middle-income countries: a systematic review and meta-analysis
Source: PubMed Central journal article supplement — BMJ Open. 2022 Mar 11;12(3):e058187. doi: 10.1136/bmjopen-2021-058187 (PMC8919464; doi:10.1136/bmjopen-2021-058187), 2022-03-11
Supplement: bmjopen-2021-058187supp004.pdf [file bmjopen-2021-058187supp004.pdf]

**Supplementary file 4: Newcastle Ottawa (NOS) critical appraisal evaluation for Cross-sectional studies**

| S.no | Author, Year of publication | Representativeness of the sample | Sample size | Non-respondent | Ascertainment of the exposure (risk factor) | Comparability (Confounding factors are controlled) | Assessment of outcome | Statistical Analysis | Total score |
|------|-----------------------------|----------------------------------|-------------|----------------|---------------------------------------------|----------------------------------------------------|-----------------------|----------------------|-------------|
| 1    | Bedaso A. et al [43]        | 1                                | 1           | 0              | 2                                           | 1                                                  | 2                     | 1                    | 8           |
| 2    | Takele G.et al [44]         | 1                                | 1           | 0              | 2                                           | 1                                                  | 1                     | 1                    | 7           |
| 3    | Woldegerima YB. et al [15]  | 1                                | 1           | 1              | 2                                           | 1                                                  | 1                     | 1                    | 7           |
| 4    | Mulugeta H. et al [16]      | 1                                | 1           | 1              | 2                                           | 1                                                  | 2                     | 1                    | 9           |
| 5    | Adesanmi A. et al [30]      | 0                                | 1           | 0              | 2                                           | 0                                                  | 2                     | 1                    | 6           |
| 6    | Nigussie S. et al [5]       | 1                                | 1           | 0              | 1                                           | 1                                                  | 2                     | 1                    | 7           |
| 7    | Ebirim L., Tobin, M [49]    | 1                                | 0           | 0              | 2                                           | 1                                                  | 1                     | 1                    | 6           |
| 8    | Srahbzu M. et al [45]       | 1                                | 1           | 0              | 2                                           | 1                                                  | 1                     | 1                    | 7           |
| 9    | Ryamukuru, David [46]       | 1                                | 1           | 0              | 1                                           | 1                                                  | 1                     | 1                    | 6           |
| 10   | Mellouli et al [47]         | 1                                | 1           | 0              | 1                                           | 1                                                  | 1                     | 1                    | 6           |
| 11   | Dagona, Sabo Saleh [48]     | 1                                | 1           | 0              | 1                                           | 1                                                  | 1                     | 1                    | 6           |
| 12   | Mthias AT et al [50]        | 1                                | 1           | 0              | 2                                           | 1                                                  | 2                     | 1                    | 8           |
| 13   | Carneiro AF et al [51]      | 1                                | 1           | 0              | 2                                           | 1                                                  | 2                     | 1                    | 8           |
| 14   | Ramesh C et al [52]         | 1                                | 1           | 1              | 2                                           | 1                                                  | 2                     | 1                    | 9           |
| 15   | Gonçalves et al [53]        | 1                                | 1           | 0              | 2                                           | 1                                                  | 1                     | 1                    | 7           |
| 16   | Maria Luiza MA et al [54]   | 1                                | 1           | 0              | 2                                           | 1                                                  | 2                     | 1                    | 8           |
| 17   | Caumo W et al [55]          | 1                                | 1           | 0              | 2                                           | 1                                                  | 2                     | 1                    | 8           |
| 18   | Jafar MF et al [22]         | 1                                | 1           | 0              | 2                                           | 1                                                  | 1                     | 1                    | 7           |
| 19   | Maheshwari D, Ismail S [7]  | 1                                | 1           | 0              | 2                                           | 1                                                  | 2                     | 1                    | 8           |
| 20   | Ali A et al [56]            | 1                                | 1           | 1              | 2                                           | 1                                                  | 2                     | 1                    | 9           |
| 21   | Ayman M Y et al [57]        | 1                                | 1           | 0              | 2                                           | 1                                                  | 2                     | 1                    | 8           |
| 22   | Tajgna K et al [58]         | 1                                | 1           | 1              | 2                                           | 1                                                  | 2                     | 1                    | 9           |
| 23   | Le Xu et al [59]            | 1                                | 1           | 1              | 2                                           | 1                                                  | 2                     | 1                    | 9           |
| 24   | Sntos LJF et al [60]        | 1                                | 1           | 0              | 2                                           | 1                                                  | 2                     | 1                    | 8           |
| 25   | Khalili et al [61]          | 1                                | 1           | 0              | 2                                           | 1                                                  | 1                     | 1                    | 7           |
| 26   | Arshi et al [62]            | 1                                | 1           | 0              | 1                                           | 1                                                  | 1                     | 1                    | 6           |
| 27   | Bansal T et al [62]         | 1                                | 1           | 0              | 2                                           | 1                                                  | 1                     | 1                    | 7           |

**NB:** NOS score  $\geq 8$  (High quality), 6-7 (moderate quality), and  $\leq 5$  (low quality)
