# Supplementary material for: Prevalence and factors associated with preoperative anxiety among patients undergoing surgery in low-income and middle-income countries: a systematic review and meta-analysis
Source: PubMed Central journal article supplement — BMJ Open. 2022 Mar 11;12(3):e058187. doi: 10.1136/bmjopen-2021-058187 (PMC8919464; doi:10.1136/bmjopen-2021-058187), 2022-03-11
Supplement: bmjopen-2021-058187supp005.pdf [file bmjopen-2021-058187supp005.pdf]

**Supplementary file 5:** Factors associated with pre-operative anxiety among patients undergoing surgery in LMICs.

| Author                 | Key results on factors associated with preoperative anxiety                                                                                                                                                                                                                                                                                                                                                                                                                                                                                                                                                                                    |
|------------------------|------------------------------------------------------------------------------------------------------------------------------------------------------------------------------------------------------------------------------------------------------------------------------------------------------------------------------------------------------------------------------------------------------------------------------------------------------------------------------------------------------------------------------------------------------------------------------------------------------------------------------------------------|
| Bedaso A. et al (14)   | <ul style="list-style-type: none"> <li>○ Having strong social support (AOR = 0.16, 95%CI = 0.07-0.34),</li> <li>○ Fear of harm from doctor or nurse mistake (AOR = 5.03, 95%CI = 2.85-8.89),</li> <li>○ unexpected result of the surgery (AOR = 3.03, 95%CI = 1.73-5.19),</li> <li>○ Fear of unable to recover (AOR = 2.96, 95%CI = 1.18-4.87), and</li> <li>○ Need of blood transfusion (AOR = 2.76, 95%CI = 1.65-4.62)</li> </ul>                                                                                                                                                                                                            |
| Takele G. et al (15)   | <ul style="list-style-type: none"> <li>○ Being female (AOR 3.30, 95% CI 1.30, 8.34),</li> <li>○ Orthopaedics surgery (AOR 4.24, 95% CI 1.23, 14.05),</li> <li>○ Not having information (AOR 2.48, 95% CI 1.11, 5.56),</li> <li>○ Postponement of surgery (AOR 5.53, 95% CI: 1.28, 23.91) and</li> <li>○ Not listening music (AOR 3.41, 95% CI: 1.45, 7.98)</li> </ul>                                                                                                                                                                                                                                                                          |
| Woldegerima et al (16) | <ul style="list-style-type: none"> <li>○ Fear of death (AOR = 2.40, 95% CI = 1.08, 5.32),</li> <li>○ Family concern (AOR = 2.15, 95% CI = 1.03, 4.50),</li> <li>○ Fear of dependency (AOR = 2.75, 95% CI = 1.57, 7.20) and</li> <li>○ Fear of disability (AOR = 2.75, 95% CI = 1.22, 6.21).</li> <li>○ Being at the age of 18–30 years (AOR = 6.92, 95% CI = 1.39, 33.82),</li> <li>○ Age 31–45 years (AOR = 5.72, 95% CI = 1.61, 20.28),</li> <li>○ No income (AOR = 3.21, 95% CI = 1.01, 10.27),</li> <li>○ Low income (AOR = 3.06, 95% CI = 1.18, 7.93).</li> <li>○ Rural residency (AOR = 0.38, 95% CI = 0.16, 0.89)</li> </ul>            |
| Mulugeta H. et al (17) | <ul style="list-style-type: none"> <li>○ Being female patients (AOR 2.19, 95%CI: 1.29, 3.71) and</li> <li>○ Lack preoperative information (AOR 2.03, 95%CI: 1.22, 3.39).</li> </ul>                                                                                                                                                                                                                                                                                                                                                                                                                                                            |
| Nigussie S. et al (5)  | <ul style="list-style-type: none"> <li>○ Being single (<math>\beta=5.288</math>, 95%CI: (2.149, 8.428), <math>P&lt;0.001</math>),</li> <li>○ Divorced marital status (<math>\beta=5.629</math>, 95%CI (0.053, 11.205), <math>P&lt;0.048</math>),</li> <li>○ Income (<math>\beta=0.002</math>, 95%CI: (0.001, 0.004), <math>P=0.001</math>),</li> <li>○ Time of operation (afternoon) (<math>\beta=-2.770</math>, 95%CI: <math>-4.906</math>, <math>-0.633</math>), <math>P=0.011</math>)</li> <li>○ No preoperative information (<math>\beta= -2.337</math>, 95%CI: <math>-4.65</math>, <math>-0.018</math>), <math>P=0.04</math>).</li> </ul> |
| Srahbzu M. et al (18)  | <ul style="list-style-type: none"> <li>○ Being female (AOR=1.9995%CI: 1.11, 3.57),</li> <li>○ Having a chronic medical illness (AOR=3.0795%CI:1.36, 6.92),</li> <li>○ Having a family history of mental illness (AOR=2.24, 95%CI: 1.05, 5.4.9),</li> <li>○ Lower extremity injury (AOR=2.93, 95%CI: 1.38, 6.21) and</li> <li>○ Having severe pain (AOR=2.75, 95%CI: 1.32, 5.74)</li> </ul>                                                                                                                                                                                                                                                     |

|                       |                                                                                                                                                                                                                                                                                                                                                                                                                                                   |
|-----------------------|---------------------------------------------------------------------------------------------------------------------------------------------------------------------------------------------------------------------------------------------------------------------------------------------------------------------------------------------------------------------------------------------------------------------------------------------------|
| Ryamukuru, David (49) | <ul style="list-style-type: none"> <li>○ Orthopaedic surgery (OR: 10.22; 95% CI: 1.144, 91.304; P= 0.037).</li> <li>○ Old patients (OR: 0.22, 95% CI: 0.075, 0.650; P=0.006).</li> </ul>                                                                                                                                                                                                                                                          |
| Mellouli et al (50)   | <ul style="list-style-type: none"> <li>○ High grade of surgery (AOR: 9, 95% CI: 3.4, 23.8) and</li> <li>○ High level of information requirement (AOR: 1.5, 95% CI: 1.30, 1.70)</li> </ul>                                                                                                                                                                                                                                                         |
| Mthias AT et al (61)  | <ul style="list-style-type: none"> <li>○ Those who having a previous experience of surgery reported less anxiety (p&lt;0.05).</li> <li>○ Females patients who had a previous surgery were less anxious than those who had never experienced surgery (p=0.011)</li> </ul>                                                                                                                                                                          |
| Ramesh C et al (60)   | <ul style="list-style-type: none"> <li>○ Female reported a high level of state anxiety (<math>X^2=11.57</math>, <math>p &lt; 0.001</math>)</li> </ul>                                                                                                                                                                                                                                                                                             |
| Gonçalves et al (53)  | <ul style="list-style-type: none"> <li>○ Women had a significantly higher scores of preoperative anxiety than men (p=0.003).</li> <li>○ There is a significantly higher difference in anxiety in the group of patients who had undergone previous heart surgery (p=0.012) and among smokers (p=0.039).</li> </ul>                                                                                                                                 |
| Caumo W et al (55)    | <ul style="list-style-type: none"> <li>○ A history of cancer (AOR=2.26; 95%CI: 1.43–3.57),</li> <li>○ Being female gender (AOR: 2, 95% CI: 1.24, 3.26) and</li> <li>○ A history of smoking (AOR=7.47, 95% CI: 1.47, 37.81)</li> </ul>                                                                                                                                                                                                             |
| Fathi M et al (68)    | <ul style="list-style-type: none"> <li>○ Being females (r= 0.80, P&lt; 0.001) and</li> <li>○ Older patients (r= 0.226, P&lt;0.001) had significant correlation with anxiety.</li> </ul>                                                                                                                                                                                                                                                           |
| Maheshwari et al (12) | <ul style="list-style-type: none"> <li>○ Age <math>\leq</math> 25 years (AOR: 3.11, 95%CI: 1.03, 9.32, P= 0.04),</li> <li>○ Nulli and primiparous (AOR: 2.87, 95%CI: 1.38, 5.98, P=0.05),</li> <li>○ General anaesthesia in previous surgery (AOR: 4.29, 95% CI: 1.93, 9.53)</li> <li>○ No previous surgery (AOR: 14.72, 95%CI: 3.13, 69.28) and</li> <li>○ Source of information from non-anaesthetist (AOR: 0.18, 95%CI: 0.07, 0.45)</li> </ul> |
| Ocalan R et al (67)   | <ul style="list-style-type: none"> <li>○ Age (r= -0.326, P=0.011),</li> <li>○ Educational level (r=0.258, P=0.046),</li> <li>○ Immediate (r=0.715, P&lt;0.001) and late (r=0.605, P&lt;0.001) postoperative pain had significant correlation with preoperative anxiety.</li> </ul>                                                                                                                                                                |
| Ali A et al (62)      | <ul style="list-style-type: none"> <li>○ A significant positive correlation was found between the days of hospitalization and preoperative score (r= 0.370, P= 0.001).</li> </ul>                                                                                                                                                                                                                                                                 |
| Erkilic E et al (66)  | <ul style="list-style-type: none"> <li>○ Being women and less educated patients undergoing surgery had significant association with preoperative anxiety (P&lt;0.05).</li> </ul>                                                                                                                                                                                                                                                                  |

|                         |                                                                                                                                                                                                                                                                                                                                                  |
|-------------------------|--------------------------------------------------------------------------------------------------------------------------------------------------------------------------------------------------------------------------------------------------------------------------------------------------------------------------------------------------|
| Sntos LJF et al<br>[60] | <ul style="list-style-type: none"><li>○ Gastrointestinal problems (<math>r=0.3975</math>, <math>P&lt;0.05</math>) and</li><li>○ Sexual problem (<math>r=0.4017</math>, <math>P&lt;0.05</math>) had a moderate correlation with anxiety</li></ul>                                                                                                 |
| Khalili et al<br>(65)   | <ul style="list-style-type: none"><li>○ Old age (OR= 0.95, 95%CI: 0.93, 0.97),</li><li>○ Female gender (OR: 2.33, 95%CI: 1.26, 4.29),</li><li>○ Urban residence (OR: 3.73, 95%CI: 1.65, 8.44) and</li><li>○ Inadequate patients' awareness about adverse effect of anaesthesia (OR: 3.43, 95%CI: 1.53, 7.67; <math>p&lt; 0.05</math>).</li></ul> |
